# Supplementary figures and images for: Diallyl trisulfide inhibits 4-(methylnitrosamino)-1-(3-pyridyl)-1-butanone-induced lung cancer via modulating gut microbiota and the PPARγ/NF-κB pathway
Source: Royal Society of Chemistry journal article supplement (doi:10.1039/d3fo03914e), 2023-11-28

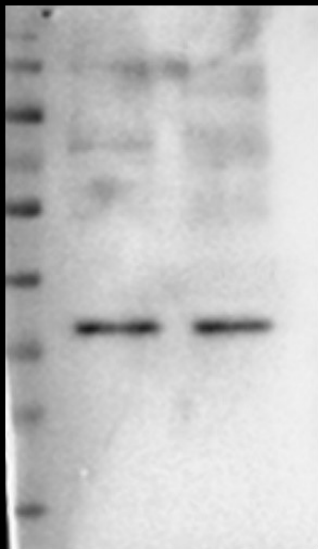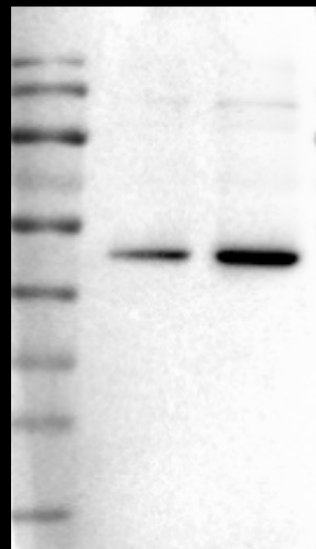

Supplement: d3fo03914e1.pdf [file d3fo03914e1.pdf]

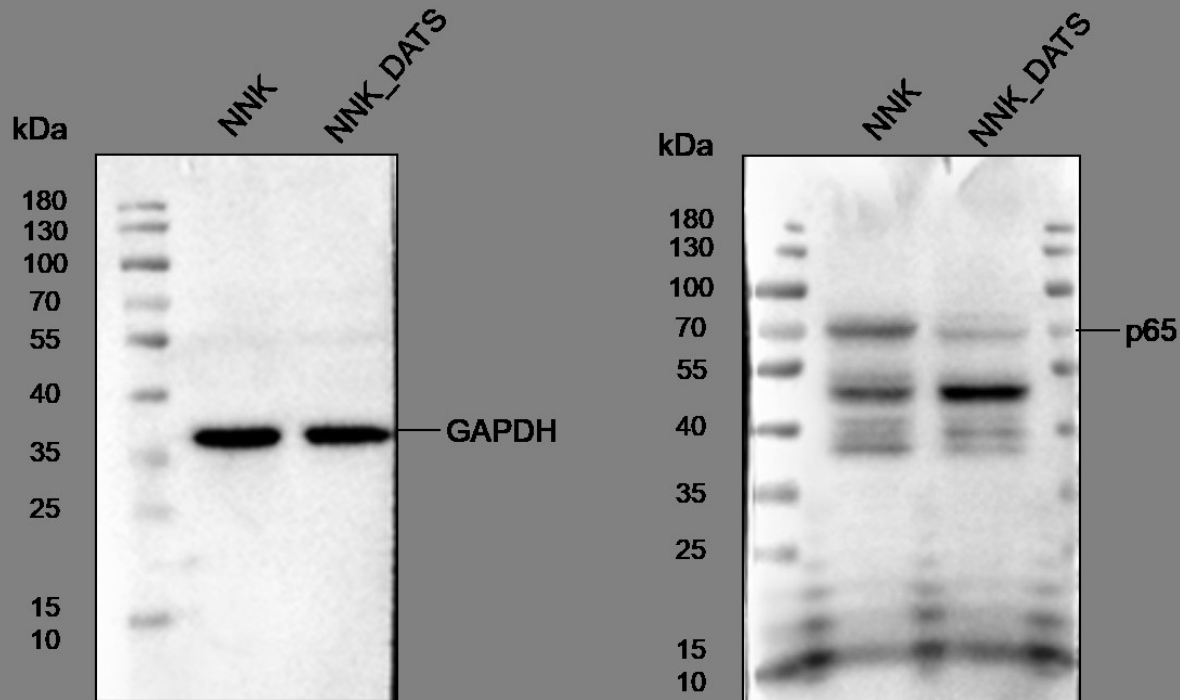

Supplement: d3fo03914e2.pdf [file d3fo03914e2.pdf]

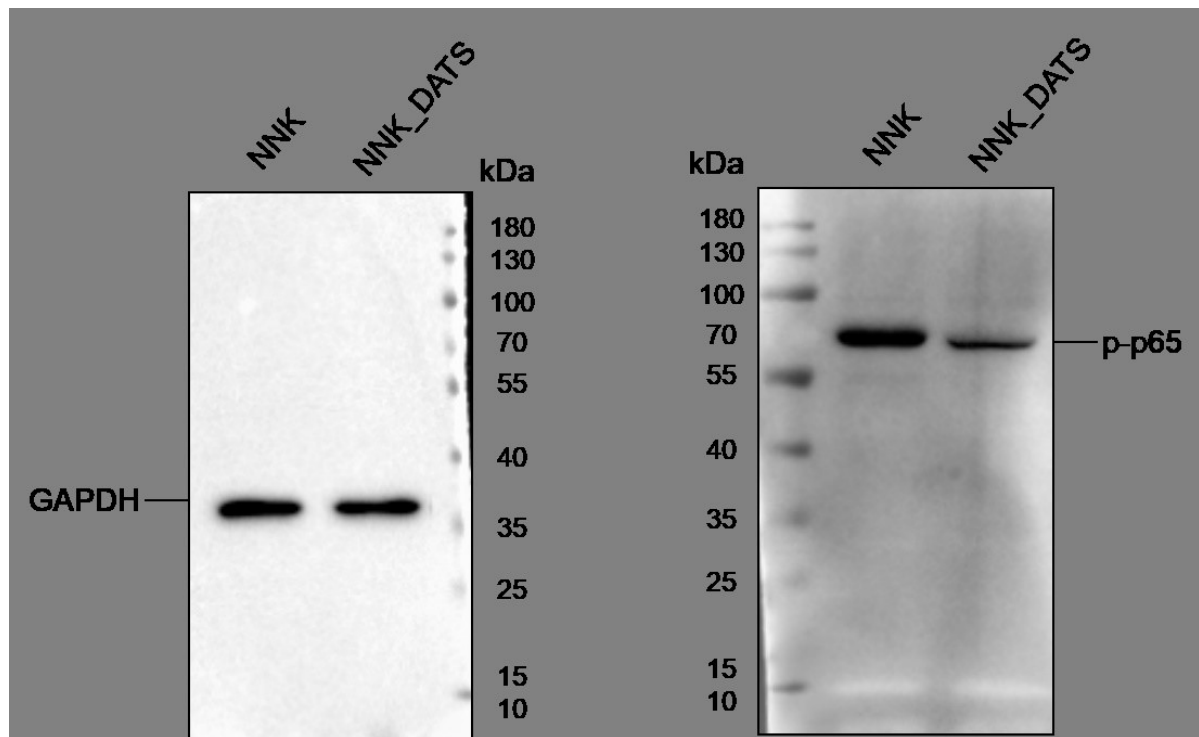

Supplement: d3fo03914e3.pdf [file d3fo03914e3.pdf]

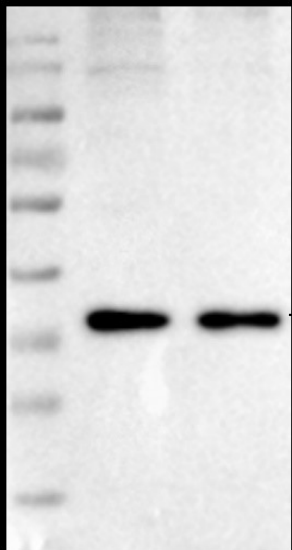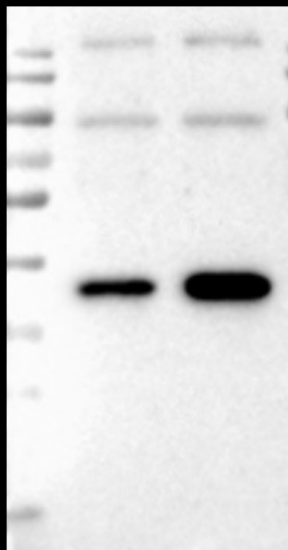

Supplement: d3fo03914e4.pdf [file d3fo03914e4.pdf]
